# Supplementary material
Source: PubMed Central journal article supplement (PMC5396548)
Supplement: NIHMS810151-supplement-01.pdf [file NIHMS810151-supplement-01.pdf]

**Supplemental Figure 1.** Longitudinal orientation of human PanIN and PDG. PDG (arrowheads) are found closely associated with overlying PanIN (arrows). Asterisk shows normal ductal epithelium. Modest TFF2 expression and Ki-67 positive proliferating cells can be found only in PDG but not in overlying PanIN. Scale Bars: 100 $\mu$ m.

**Supplemental Figure 2.** PDG in KC/TFF2KO mice. Compared to KC mice, KC/TFF2KO show enlarged PDG with micro-papillary changes. BrdU incorporation is high in KC/TFF2KO. Scale Bar: 50 $\mu$ m.

**Supplemental Figure 3.** RNA expression of TFF2 in HPDE and cancer cell lines (RT-PCR).

**Supplemental Figure 4.** TFF2 inhibit proliferation of PANC-1 cells. (A) Enforced expression of TFF2 result in the decrease of BrdU incorporation in PANC-1. (B) TFF2-transfected PANC-1 cells show almost a 3-fold decrease of BrdU incorporation.

**Supplemental Figure 5.** (A) Western blot of other pancreatic cancer cell lines (MiaPaca-2 and colo-357) also shows TFF2 induced upregulation. (B) The upregulation of SMAD4 by TFF2 is abrogated by the co-transfection of sh-SMAD4.

**Supplemental Figure 6.** Treatment of (A) PANC-1 and (B) AsPC-1 cell lines with TFF2 peptide (600nM) for 24 hours showing an upregulation of SMAD4 protein and mRNA.

**Supplemental Figure 7.** Effect of TFF2 overexpression (TFF2 ox) on cell proliferation in

SMAD4 null (BxPC3, Cfpac-1) and mutated (Capan-1) PDAC cell lines.

**Supplemental Figure 8.** TFF2 promoter methylation and SMAD4 regulation in HPDE cells.

(A) TFF2 promoter DNA methylation profile of HPDE cells by pyrosequencing. Lymphocyte DNA and Sss1 methylated DNA are used as controls. (B) TFF2 overexpression in HPDE cells for 48 hours results in SMAD4 upregulation.

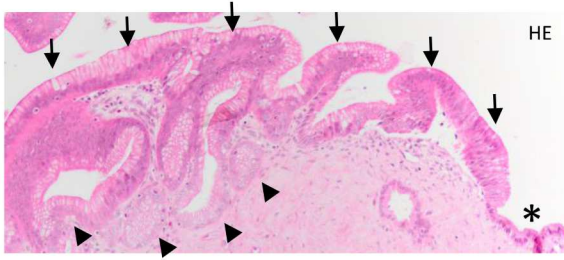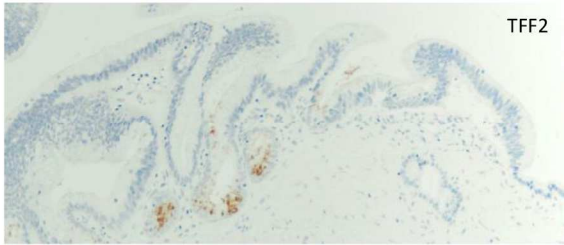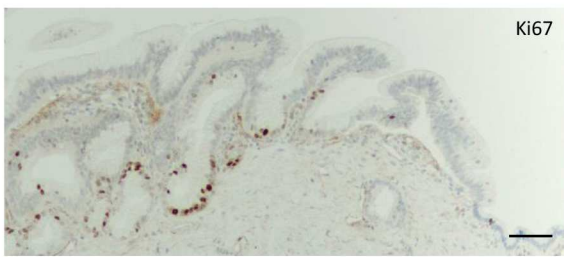

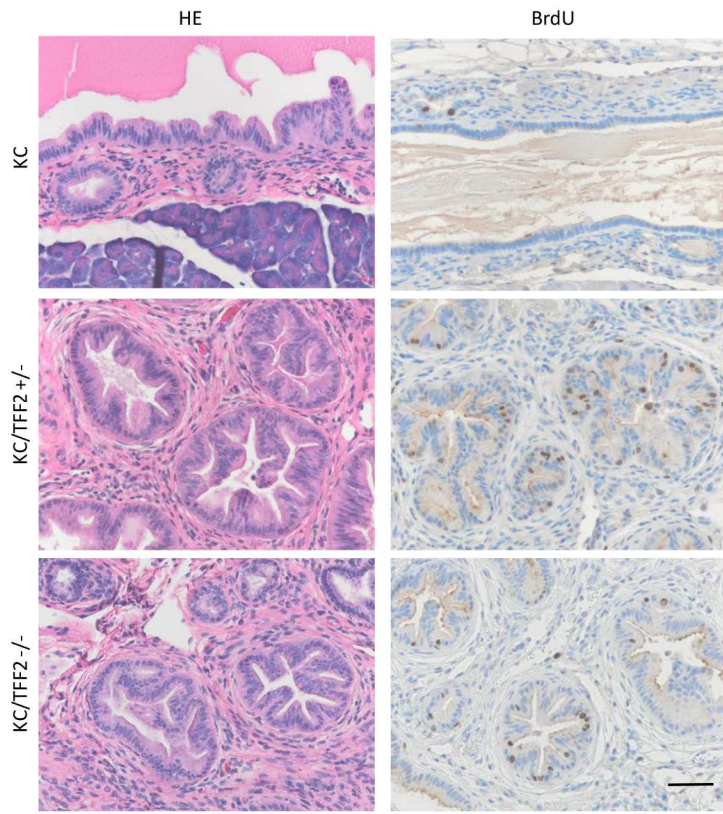

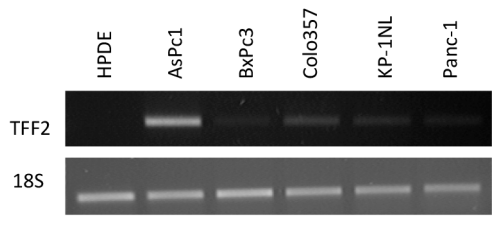

A

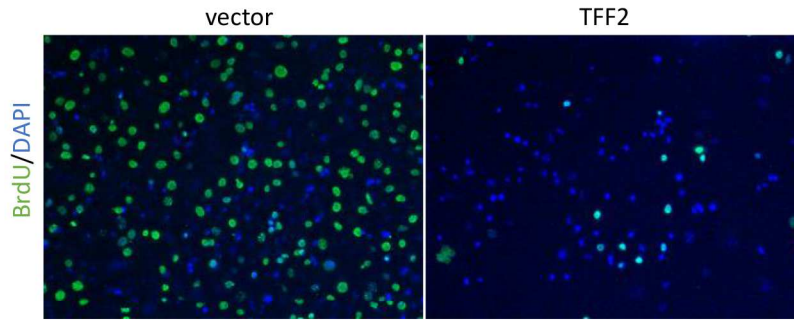

B

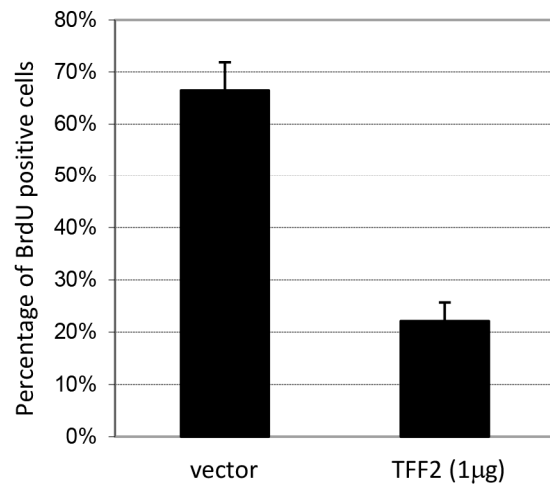

**A**

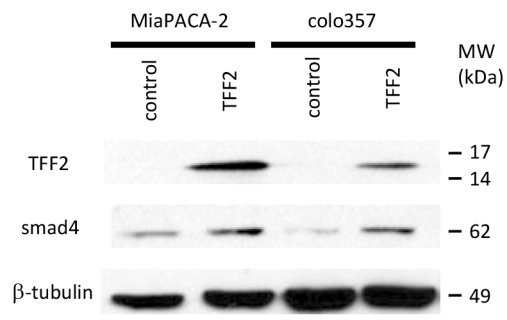

**B**

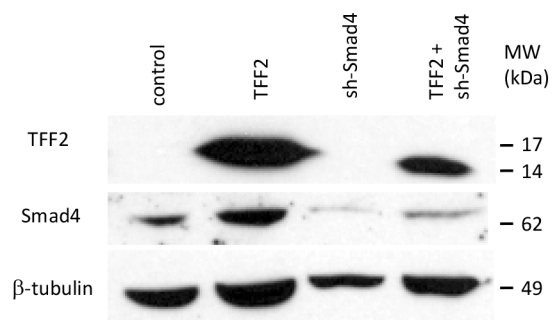

A

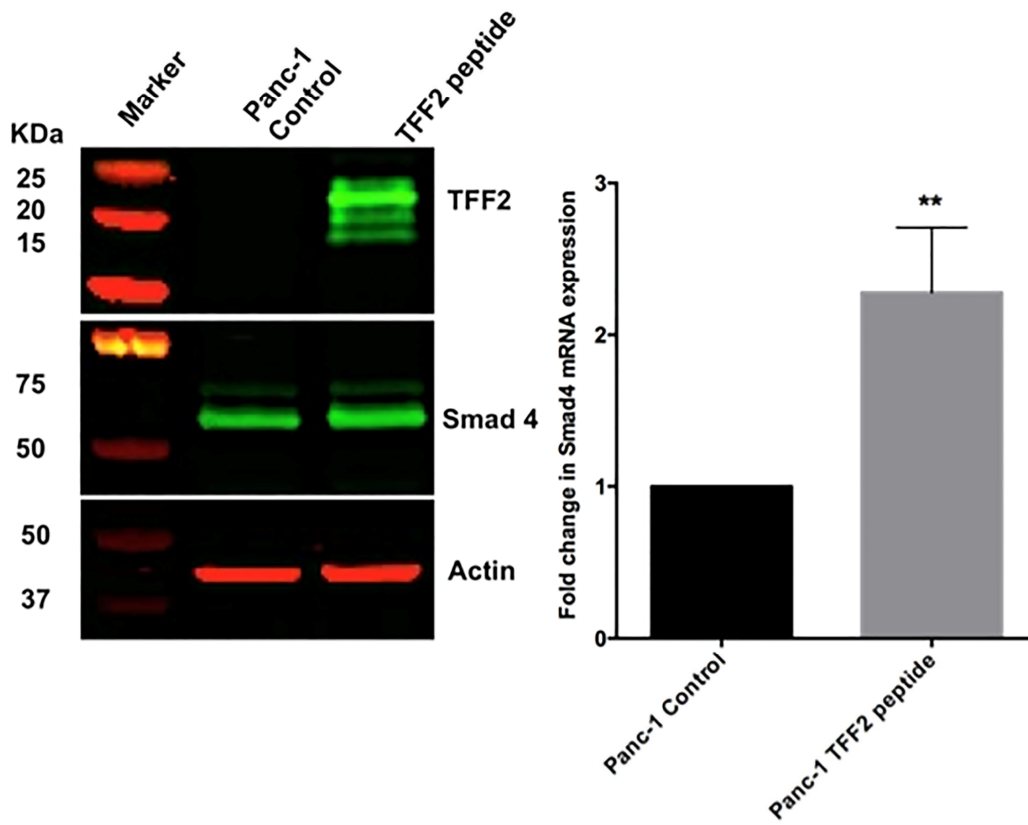

B

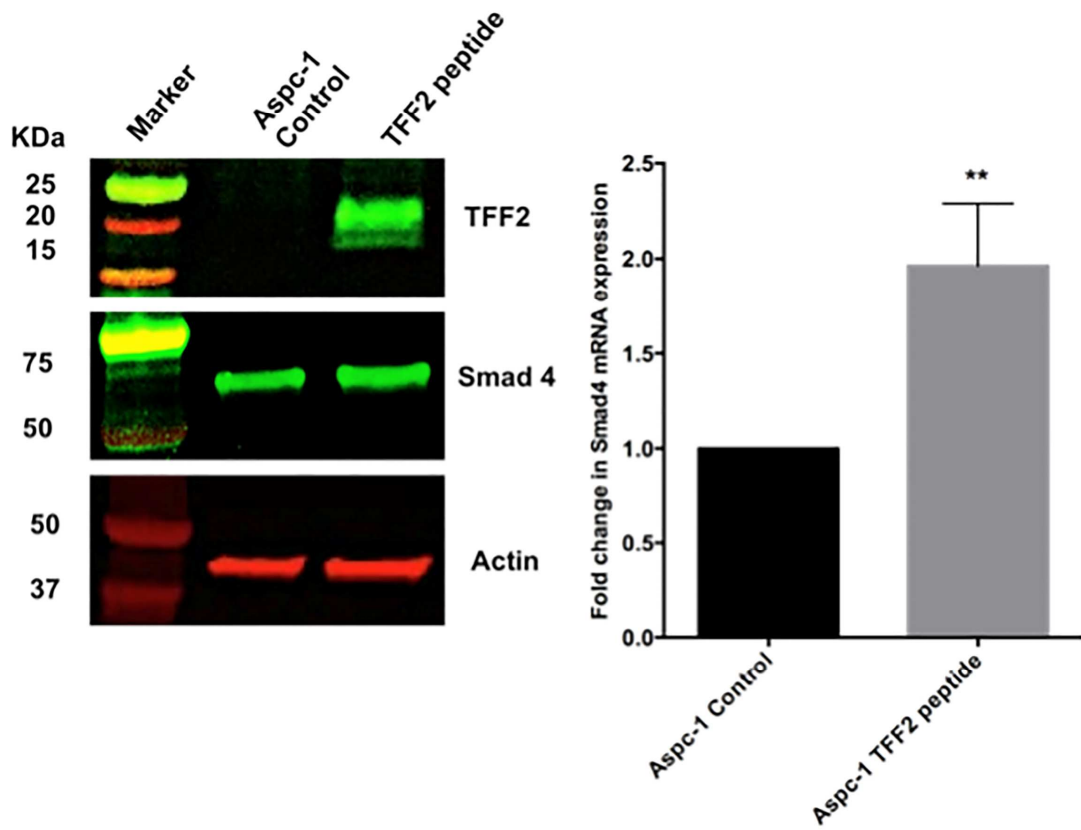



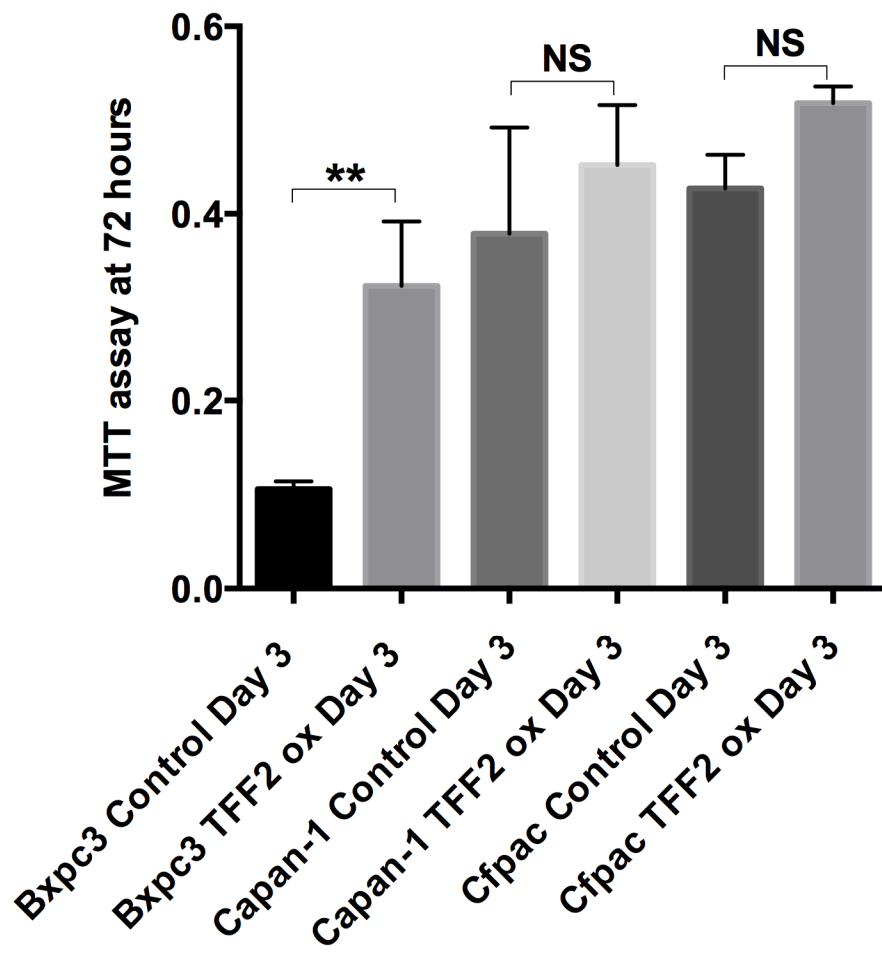

**A**

|                                      |               |       |       |       |       |
|--------------------------------------|---------------|-------|-------|-------|-------|
| chr21:423..... (hg38)                | 50951         | 50948 | 50943 | 50926 | 50919 |
| Relative to Transcription Start Site | 149           | 152   | 157   | 174   | 181   |
| Sample                               | % methylation |       |       |       |       |
| HDPE cells                           | 98            | 88    | 71    | 77    | 71    |
| Lymphocyte DNA                       | 96            | 96    | 100   | 92    | 89    |
| Sss1 methylated DNA                  | 98            | 98    | 100   | 94    | 93    |

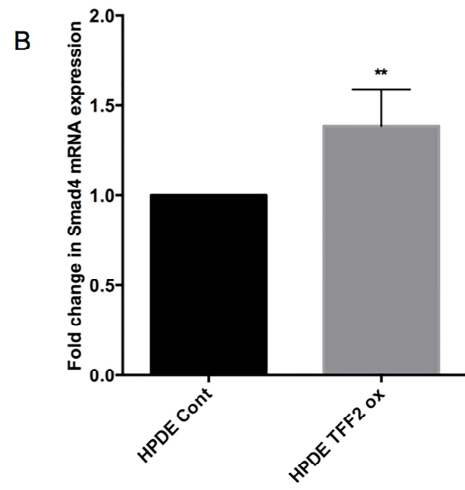

Supplemental Table 1. Conditions and primary antibodies for immunohistochemistry.

| Protein of Interest       | Species         | Antibody by  | Clone   | Concentration |
|---------------------------|-----------------|--------------|---------|---------------|
| TFF1                      | human           | Invitrogen   | BC04    | 1:50          |
| TFF1                      | human and mouse | Abcam        | ab50806 | 1:200         |
| TFF2                      | human           | Novocastra   | GE16C   | 1:50          |
| TFF2                      | human and mouse | Protein Tech |         | 1:500         |
| MUC2                      | mouse           | Santa Cruz   | H-300   | 1:400         |
| MUC5AC                    | human           | Novocastra   | CLH2    | 1:200         |
| MUC5AC                    | mouse           | Santa Cruz   | H-160   | 1:200         |
| MUC6                      | human           | Novocastra   | CLH5    | 1:100         |
| MUC6 (deep gastric mucin) | mouse           | Dr. Ho       |         | 1:3000        |
| Ki67                      | human           | Dako         | MIB-1   | 1:100         |
| Ki67                      | mouse           | Dako         | TEC3    | 1:25          |
| BrdU                      | mouse           | Abcam        | ab6326  | 1:100         |

Supplemental Table 2: The sequences of primer sets for D-loop of mitochondrial DNA

|              | forward (5' -3')         | reverse (5' -3')         |
|--------------|--------------------------|--------------------------|
| primer set 1 | ACTCCACCATTAGCACCCAAAGC  | GGGGTCATCCATGGGGACGAGA   |
| primer set 2 | AGCCACCCCTCACCCACTAGG    | ATGGAGAGCTCCCGTGAGTGGT   |
| primer set 3 | TCGCTCCGGGCCATAAACT      | TGTCTGTGTGGAAAGTGGCTGTGC |
| primer set 4 | GCCGGAGCACCCCTATGTCGC    | GGGCGGGGGTTGTATTGATGAGA  |
| primer set 5 | GCTTCTGGCCACAGCACTTAAACA | TGGGGTGATGTGAGCCCGTCT    |
| primer set 6 | TTCATCAATAACAACCCCGCCCA  | GAGCTGCATTGCTGCGTGCT     |

### Supplemental Table 3: Sequencing of the primer pairs

Primer sequences for RT-PCR

|                                     |                       |
|-------------------------------------|-----------------------|
| <b>Gene</b>                         | TFF2                  |
| <b>Sense Primer (5' to 3')</b>      | AAACCCTCCCCCTGCCAGTGC |
| <b>Anti-sense Primer (5' to 3')</b> | CCGAGAGGCGCATTCCCTCGG |
| <b>Anneal. °C</b>                   | 60                    |

|                                     |                      |
|-------------------------------------|----------------------|
| <b>Gene</b>                         | SMAD4                |
| <b>Sense Primer (5' to 3')</b>      | TTGCATTCCAGCCTCCCATT |
| <b>Anti-sense Primer (5' to 3')</b> | AAGACCGCGTGGTCACTAAG |
| <b>Anneal. °C</b>                   | 60                   |

Pyrosequencing primer sequences

|                                     |                              |
|-------------------------------------|------------------------------|
| <b>Gene</b>                         | TFF2                         |
| <b>Sense Primer (5' to 3')</b>      | TGTTTGTGGATAAATAGAGGGGAGATT  |
| <b>Anti-sense Primer (5' to 3')</b> | TCCTTCACTTACAAAATTTCTCACTCCC |
| <b>Sequencing Primer (5' to 3')</b> | GTGTAGTTGAGTTAGATATGG        |
| <b>Anneal. °C</b>                   | 60                           |

**Supplemental Table 4.** Summary of mutational mapping of PDG and IPMN.

Of 195 pairs of PDG and IPMN, only 7 pairs were found to be mismatched (p=0.0012).

|        | site   | 72 | 73 | 195 | 263 | 489 | 16223 | 16278 | 16294 | 16298 | 16311 | 16320 | 16355 | 16362 | 16519 | 16558 |
|--------|--------|----|----|-----|-----|-----|-------|-------|-------|-------|-------|-------|-------|-------|-------|-------|
| Case 1 | PDG 1  | T  | A  | C   | G   | T   | C     | C     | C     | C     | C     | C     | C     | T     | T     | G     |
|        | IPMN 1 | T  | A  | C   | G   | T   | C     | C     | C     | C     | C     | C     | T     | T     | C     | G     |
|        | PDG 2  | T  | G  | C   | G   | T   | T     | C     | C     | C     | C     | C     | C     | C     | T     | G     |
|        | IPMN 2 | T  | G  | C   | G   | T   | T     | C     | C     | C     | C     | C     | C     | C     | T     | G     |
|        | PDG 3  | T  | G  | T   | G   | C   | T     | T     | C     | T     | T     | C     | C     | C     | T     | G     |
|        | IPMN 3 | T  | G  | T   | G   | C   | T     | T     | C     | T     | T     | C     | C     | C     | T     | G     |
| Case 2 | PDG 4  | T  | A  | T   | G   | T   | T     | T     | C     | T     | T     | C     | C     | C     | C     | G     |
|        | IPMN 4 | T  | A  | T   | G   | C   | T     | T     | C     | T     | T     | C     | C     | C     | C     | G     |
|        | PDG 5  | T  | G  | T   | G   | T   | T     | T     | C     | T     | T     | C     | C     | C     | C     | G     |
|        | IPMN 5 | T  | G  | T   | G   | T   | T     | T     | C     | T     | T     | C     | C     | C     | C     | G     |
|        | PDG 6  | T  | A  | T   | G   | C   | T     | T     | T     | T     | T     | C     | C     | T     | C     | A     |
|        | IPMN 6 | T  | A  | T   | G   | C   | T     | T     | T     | T     | T     | C     | C     | T     | C     | A     |
| Case 3 | PDG 7  | T  | G  | T   | G   | C   | C     | C     | C     | T     | T     | C     | C     | T     | T     | G     |
|        | IPMN 7 | T  | G  | T   | G   | C   | C     | C     | C     | T     | T     | C     | C     | T     | T     | G     |
|        | PDG 8  | T  | G  | T   | G   | C   | C     | C     | C     | T     | T     | C     | C     | T     | T     | G     |
|        | IPMN 8 | T  | G  | T   | G   | C   | C     | C     | C     | T     | T     | C     | C     | T     | T     | G     |
|        | PDG 9  | T  | G  | T   | G   | C   | C     | C     | C     | T     | T     | C     | C     | T     | T     | G     |
|        | IPMN 9 | T  | A  | T   | A   | T   | C     | C     | C     | T     | T     | C     | C     | T     | T     | G     |

|         |         |   |   |   |   |   |   |   |   |   |   |   |   |   |   |   |
|---------|---------|---|---|---|---|---|---|---|---|---|---|---|---|---|---|---|
| Case 4  | PDG 10  | C | G | T | G | T | C | T | C | T | T | C | C | C | T | G |
|         | IPMN 10 | C | G | T | G | T | C | T | C | T | T | C | C | C | T | G |
|         | PDG 11  | T | G | T | G | T | C | T | C | T | T | C | C | C | T | G |
|         | IPMN 11 | T | G | T | G | T | C | T | C | T | T | C | C | C | T | G |
|         | PDG 12  | C | A | T | G | T | C | T | C | T | T | C | C | C | T | G |
|         | IPMN 12 | C | A | T | G | T | C | T | C | T | T | C | C | C | T | G |
| PDG 13  | C       | G | T | G | T | C | C | C | T | C | C | C | C | C | C | G |
| IPMN 13 | C       | G | T | G | T | C | C | C | T | T | C | C | C | C | C | G |

**Supplemental Table 5.** IPMN development found in each mice

|       | KRAS <sup>G12D</sup> ; TFF2 +/+ |                    | KRAS <sup>G12D</sup> ; TFF2 +/- |                    | KRAS <sup>G12D</sup> ; TFF2 -/- |                    |
|-------|---------------------------------|--------------------|---------------------------------|--------------------|---------------------------------|--------------------|
|       | low grade<br>IPMN               | high grade<br>IPMN | low grade<br>IPMN               | high grade<br>IPMN | low grade<br>IPMN               | high grade<br>IPMN |
| 2 m/o | 0/6 (0%)                        | 0/6 (0%)           | 7/10 (70.0%)                    | 1/10 (10.0%)       | 7/9 (77.8%)                     | 2/9 (22.2%)        |
| 4 m/o | 2/6 (33.3%)                     | 0/6 (0%)           | 9/10 (90%)                      | 1/10 (10.0%)       | 3/8 (37.5%)                     | 5/8 (62.5%)        |
| 6 m/o | 3/7 (42.9%)                     | 0/7 (0%)           | 4/6 (66.6%)                     | 1/6 (16.7%)        | 3/6 (50.0%)                     | 3/6 (50.0%)        |
